# Supplementary material for: Boosting the oxygen reduction activity of silver nanoclusters via selective exposure of solvent-coordinated sites
Source: Royal Society of Chemistry journal article supplement (doi:10.1039/d4qi01335b), 2024-01-01
Supplement: d4qi01335b1.pdf [file d4qi01335b1.pdf]

## Supporting information

### **Boosting oxygen reduction activity on silver nanocluster via selectively exposure of solvent coordinated sites**

*Zhao-Di Wang, Ye Han, Wen-Yan Sun, Peng Peng,\* and Shuang-Quan Zang\**

Key Laboratory of Crystalline Molecular Functional Materials, College of Chemistry,  
Zhengzhou 450001, China

E-mail: ppeng@zzu.edu.cn (P. Peng), zangsqzg@zzu.edu.cn (S-Q. Zang).

## 1. Experimental Section

### 1.1 Chemicals

All solvents and reagents were purchased from commercial sources and were used without further purification. Naphthalen-2-yl-methanethiol used in this work were synthesized according to literature methods.

### 1.2 Synthesis of $\text{Ag}_{12}(\text{SCH}_2\text{C}_{10}\text{H}_7)_6(\text{CF}_3\text{CO}_2)_6(\text{CH}_3\text{CN})_6$

Naphthalen-2-yl-methanethiol (17 mg, 0.100 mmol) and  $\text{AgCF}_3\text{CO}_2$  (44 mg, 0.200 mmol) were dissolved in 3 mL acetonitrile and 3 mL acetone at room temperature. The solution turned to nearly translucent after stirred 3-5 min. The mixed solution was kept under a dark environment for 1 days to afford pale yellow crystals. The crystals (named AgNCs) were filtered and washed with diethyl ether. (yield: 68 % based on ligand).

### 1.3 Synthesis of AgNCs@GO

AgNCs@GO was synthesized by photodeposition method. AgNCs (1mg) and GO (10mg) were mixed in 50mL dichloromethane with ultrasonic dispersion for 10 min before subjected to the irradiation. After 30 min, the mixture was centrifuged for 2 min at 10000 r/min. Then the catalyst was washed with dichloromethane and dried thoroughly at room temperature.

### 1.4 Characterization

X-ray diffraction (XRD) patterns were measured by Rigaku D/Max-2500PC X-ray diffractometer with Cu sealed tub ( $\lambda = 1.54178 \text{ \AA}$ ). Field-emission scanning electron microscopy (FESEM) images were obtained using Zeiss Sigma 500. Transmission electron microscopy (TEM) and high-resolution transmission electron microscopy (HRTEM) images were collected using FEI TalosF200S at an accelerating voltage of 200 kV. X-ray photoelectron spectroscopy (XPS) were performed on a Thermo ESCALAB 250XI electron spectrometer using 300 W Al K radiation. Inductively coupled plasma mass spectrometry (ICP-MS) were performed on ICPE-9820. UV-vis absorption spectra were recorded with a U-2000 spectrophotometer. Solid-state UV-vis absorption spectra were measured from 200 to 800 nm using barium sulfate ( $\text{BaSO}_4$ ) as a standard on a TU-1901 double-beam UV-vis spectrophotometer.

## 1.5 Electrochemical Measurements

All catalysts electrochemical performances were carried out in a conventional three-electrode cell using CHI 760E electrochemical workstation. Rotating disk electrode (RDE, 0.197 cm<sup>2</sup>) was used as working electrode, saturated Ag/AgCl electrode was used as reference electrode, Pt wire was used as counter electrode, respectively. The catalyst ink was prepared by dispersing 2 mg of catalyst and 3 mg of VXC-72R in 360 μL of DMF and 40 μL of 5 wt% nafion. Finally, 10 μL of the catalyst ink was dropped onto the RDE electrode.

Firstly, cyclic voltammetry (CV) tests were conducted in N<sub>2</sub><sup>-</sup> and O<sub>2</sub><sup>-</sup> saturated 0.1 M KOH solution from -1 V to 0.2 V with a scan rate of 50 mV s<sup>-1</sup>. The RDE tests were performed at various rotating speeds ranging from 400 to 2500 rpm with a sweep rate of 5 mV s<sup>-1</sup>. RRDE measurements were conducted by liner sweep voltammetry (LSV) from -1 V to 0.2 V at 5 mV s<sup>-1</sup> with a rotating speed of 1600 rpm using high potential (1.0 V vs RHE) on the platinum ring electrode.

All testing data were converted to reversible hydrogen electrode (RHE) via Nernst equation:  $E_{\text{RHE}} = E_{\text{Ag/AgCl}} + (0.197 + 0.0592 \text{ pH})$  before analyzing.

The electron transfers number (*n*) was respectively calculated by the following equations.

From RRDE analysis:

$$n = \frac{4I_D}{I_R/N + I_D}$$

Where *n* is the electron transfer number, *I<sub>d</sub>* is the disk current, *I<sub>r</sub>* is the ring current and *N* is the current collection efficiency (0.37) of the Pt ring of RRDE electrode.

From Koutecky-Levich (K-L) analysis:

$$\frac{1}{J} = \frac{1}{J_L} + \frac{1}{J_K} = \frac{1}{B\omega^{0.5}} + \frac{1}{J_K}$$

$$B = 0.62nFC_0(D_0)^{2/3}v^{-1/6}$$

Where *J* is the measured current density, *J<sub>k</sub>* and *J<sub>L</sub>* are the kinetic and diffusion-limited current densities. respectively, *B* is determined from the slope of the Koutechy-Levich

(K-L) plot based on Levich equation.  $\omega$  is electrode rotation rate,  $F$  is the faraday constant ( $96485 \text{ C mol}^{-1}$ ),  $D_{\text{O}_2}$  is the diffusion coefficient of  $\text{O}_2$  ( $1.90 \times 10^{-5} \text{ cm}^2 \text{ s}^{-1}$ ),  $C_0$  is the bulk concentration of  $\text{O}_2$  ( $1.2 \times 10^{-6} \text{ mol} \cdot \text{cm}^{-3}$ ), and  $\nu$  is the kinetic viscosity ( $\nu = 0.01009 \text{ cm}^2 \text{ s}^{-1}$ ). The constant 0.62 is adopted when the rotation speed is expressed in  $\text{rad s}^{-1}$ .

## 1.6 Computation methods.

### Computational Details

The Vienna ab-initio simulation package (VASP)<sup>[1-2]</sup> based on density functional theory (DFT) is employed in theoretical calculation. The generalized gradient approximation (GGA) calculation was performed with the Perdew–Burke–Ernzerhof (PBE) exchange-correlation potential.<sup>[3]</sup> A plane-wave cutoff energy of 400 eV was used. The Fermi scheme was employed for electron occupancy with an energy smearing of 0.1 eV. The first Brillouin zone was sampled in the Monkhorst-Pack grid<sup>[4]</sup> with k-point mesh of  $3 \times 3 \times 1$ . The energy (converged to  $1.0 \times 10^{-6} \text{ eV/atom}$ ) and force (converged to  $0.01 \text{ eV/\AA}$ ) were set as the convergence criterion for geometry optimization. All calculations were spin-polarized.

The ORR performed on Ag site was calculated by the following theory.

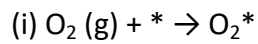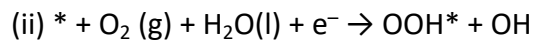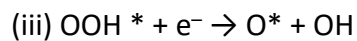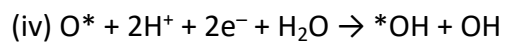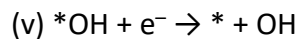

Overall reaction:

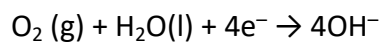

where \* represents an active site on the corresponding surface.

The electrocatalyst is working under a potential in reality. To investigate the effects of the electric potential on the activity of ORR, the free energy diagrams of ORR<sup>[5]</sup> is employed. Free energy change from initial states to final states of the reaction is calculated as follows:

$$\Delta G = \Delta E + \Delta ZPE - T\Delta S + \Delta G_U + \Delta G_{pH}$$

where  $\Delta E$  is the energy difference of reactants and products,  $\Delta ZPE$  and  $\Delta S$  is the change in zero-point energy and in entropy, respectively,  $T$  is room temperature (298.15 K).  $\Delta G = -eU$ , here  $U$  is the potential at the electrode and  $e$  is the transferred charge.  $\Delta G_{pH}$  is the correction of the  $H^+$  free energy. The free energy of  $H^+$  ions has been corrected by the concentration dependence of the entropy:

$$\Delta G_{pH} = -kT \ln[H^+] = kT \ln 10 \times pH$$

(0.773844 for 0.1M KOH).

## 2. Experimental Section

### 2.1 Chemicals

All solvents and reagents were purchased from commercial sources and were used without further purification. Naphthalen-2-yl-methanethiol used in this work were synthesized according to literature methods.

### 2.2 Synthesis of $Ag_{12}(SCH_2C_{10}H_7)_6(CF_3CO_2)_6(CH_3CN)_6$

Naphthalen-2-yl-methanethiol (17 mg, 0.100 mmol) and  $AgCF_3CO_2$  (44 mg, 0.200 mmol) were dissolved in 3 mL acetonitrile and 3 mL acetone at room temperature. The solution turned to nearly translucent after stirred 3-5 min. The mixed solution was kept under a dark environment for 1 days to afford pale yellow crystals. The crystals (named AgNCs) were filtered and washed with diethyl ether. (yield: 68 % based on ligand).

### 2.3 Synthesis of AgNCs@GO

AgNCs@GO was synthesized by photodeposition method. AgNCs (1mg) and GO (10mg) were mixed in 50mL acetonitrile with ultrasonic dispersion for 10 min before subjected to the irradiation. After 30 min, the mixture was centrifuged for 2 min at 10000 r/min. Then the catalyst was washed with acetonitrile and dried thoroughly at room temperature.

### 2.4 Characterization

X-ray diffraction (XRD) patterns were measured by Rigaku D/Max-2500PC X-ray diffractometer with Cu sealed tub ( $\lambda = 1.54178 \text{ \AA}$ ). Field-emission scanning electron microscopy (FESEM) images were obtained using Zeiss Sigma 500. Transmission

electron microscopy (TEM) and high-resolution transmission electron microscopy (HRTEM) images were collected using FEI TalosF200S at an accelerating voltage of 200 kV. X-ray photoelectron spectroscopy (XPS) were performed on a Thermo ESCALAB 250XI electron spectrometer using 300 W Al K radiation. Inductively coupled plasma mass spectrometry (ICP-MS) were performed on ICPE-9820.

### 1.5 Electrochemical Measurements

All catalysts electrochemical performances were carried out in a conventional three-electrode cell using CHI 660E electrochemical workstation. Rotating disk electrode (RDE, 0.197 cm<sup>2</sup>) was used as working electrode, saturated Ag/AgCl electrode was used as reference electrode, Pt wire was used as counter electrode, respectively. The catalyst ink was prepared by dispersing 2 mg of catalyst and 3 mg of VXC-72R in 360 μL of DMF and 40 μL of 5 wt% nafion. Finally, 10 μL of the catalyst ink was dropped onto the RDE electrode.

Firstly, cyclic voltammetry (CV) tests were conducted in N<sub>2</sub><sup>-</sup> and O<sub>2</sub><sup>-</sup> saturated 0.1 M KOH solution from -1 V to 0.2 V with a scan rate of 50 mV s<sup>-1</sup>. The RDE tests were performed at various rotating speeds ranging from 400 to 2500 rpm with a sweep rate of 5 mV s<sup>-1</sup>. RRDE measurements were conducted by liner sweep voltammetry (LSV) from -1 V to 0.2 V at 5 mV s<sup>-1</sup> with a rotating speed of 1600 rpm using high potential (1.0 V vs RHE) on the platinum ring electrode.

All testing data were converted to reversible hydrogen electrode (RHE) via Nernst equation:  $E_{\text{RHE}} = E_{\text{Ag/AgCl}} + (0.197 + 0.0592 \text{ pH})$  before analyzing.

The electron transfer number (*n*) was respectively calculated by the following equations.

From RRDE analysis:

$$n = \frac{4I_D}{I_R/N + I_D}$$

Where *n* is the electron transfer number, *I<sub>d</sub>* is the disk current, *I<sub>r</sub>* is the ring current and *N* is the current collection efficiency (0.37) of the Pt ring of RRDE electrode.

From Koutecky-Levich (K-L) analysis:

$$\frac{1}{J} = \frac{1}{J_L} + \frac{1}{J_K} = \frac{1}{B\omega^{0.5}} + \frac{1}{J_K}$$

$$B = 0.62nFC_0(D_0)^{2/3}\nu^{-1/6}$$

Where J is the measured current density,  $J_K$  and  $J_L$  are the kinetic and diffusion-limited current densities. respectively, B is determined from the slope of the Koutechy-Levich (K-L) plot based on Levich equation.  $\omega$  is electrode rotation rate, F is the faraday constant (96485 C mol<sup>-1</sup>),  $D_{O_2}$  is the diffusion coefficient of O<sub>2</sub> (1.90×10<sup>-5</sup> cm<sup>2</sup> s<sup>-1</sup>),  $C_0$  is the bulk concentration of O<sub>2</sub> (1.2×10<sup>-6</sup> mol·cm<sup>-3</sup>), and  $\nu$  is the kinetic viscosity ( $\nu=0.01009\text{cm}^2 \text{ s}^{-1}$ ). The constant 0.62 is adopted when the rotation speed is expressed in rad s<sup>-1</sup>.

## 1.6 Computation methods.

### Computational Details

The Vienna ab-initio simulation package (VASP)<sup>[1-2]</sup> based on density functional theory (DFT) is employed in theoretical calculation. The generalized gradient approximation (GGA) calculation was performed with the Perdew–Burke–Ernzerhof (PBE) exchange-correlation potential.<sup>[3]</sup> A plane-wave cutoff energy of 400 eV was used. The Fermi scheme was employed for electron occupancy with an energy smearing of 0.1 eV. The first Brillouin zone was sampled in the Monkhorst-Pack grid<sup>[4]</sup> with k-point mesh of 1×1×1. The energy (converged to 1.0 ×10<sup>-6</sup> eV/atom) and force (converged to 0.01eV/Å) were set as the convergence criterion for geometry optimization. All calculations were spin-polarized. The AgNC specie was placed in a box with the size of 30Å × 30Å × 30 Å to avoid the periodic interaction.

The ORR performed on Ag site was calculated by the following theory.

- (i) O<sub>2</sub> (g) + \* → O<sub>2</sub>\*
- (ii) \* + O<sub>2</sub> (g) + H<sub>2</sub>O(l) + e<sup>-</sup> → OOH\* + OH
- (iii) OOH \* + e<sup>-</sup> → O\* + OH
- (iv) O\* + 2H<sup>+</sup> + 2e<sup>-</sup> + H<sub>2</sub>O → \*OH + OH
- (v) \*OH + e<sup>-</sup> → \* + OH

Overall reaction:

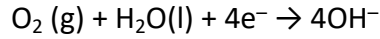

where \* represents an active site on the corresponding surface.

The electrocatalyst is working under a potential in reality. To investigate the effects of the electric potential on the activity of ORR, the free energy diagrams of ORR<sup>[5]</sup> is employed. Free energy change from initial states to final states of the reaction is calculated as follows:

$$\Delta G = \Delta E + \Delta \text{ZPE} - T\Delta S + \Delta G_U + \Delta G_{pH}$$

where  $\Delta E$  is the energy difference of reactants and products,  $\Delta \text{ZPE}$  and  $\Delta S$  is the change in zero-point energy and in entropy, respectively,  $T$  is room temperature (298.15 K).  $\Delta G = -eU$ , here  $U$  is the potential at the electrode and  $e$  is the transferred charge.  $\Delta G_{pH}$  is the correction of the  $\text{H}^+$  free energy. The free energy of  $\text{H}^+$  ions has been corrected by the concentration dependence of the entropy:

$$\Delta G_{pH} = -kT \ln[\text{H}^+] = kT \ln 10 \times pH$$

(0.773844 for 0.1M KOH).



## 2. Supplementary Figures and Tables

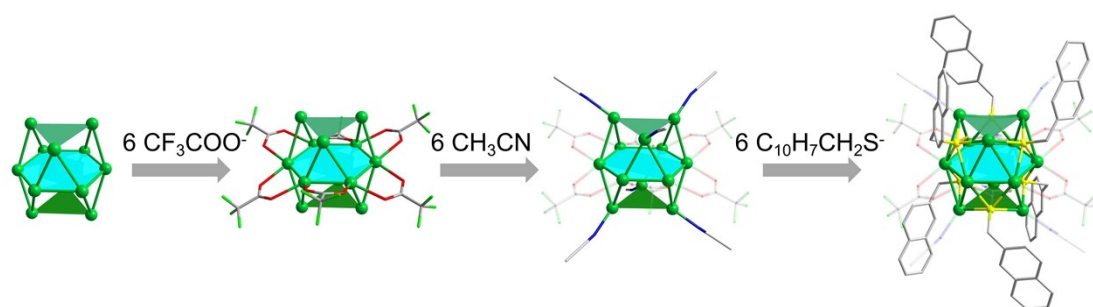

Figure S1. The structure and coordination mode of AgNCs.

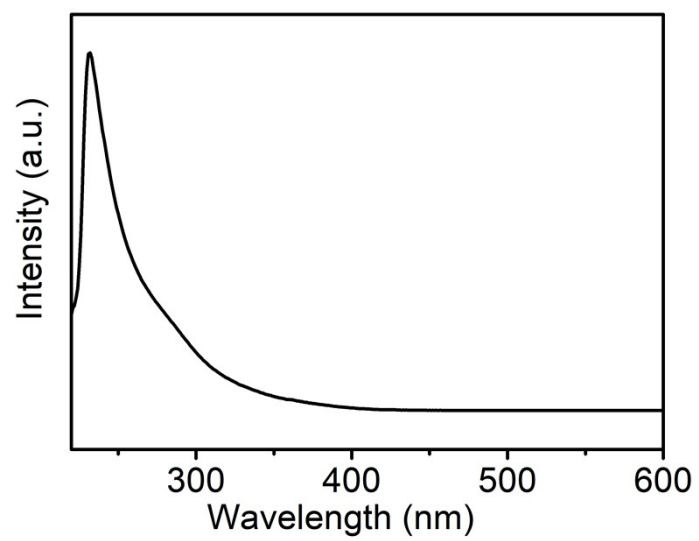

Figure S2. UV/Vis absorbance spectra of AgNCs.

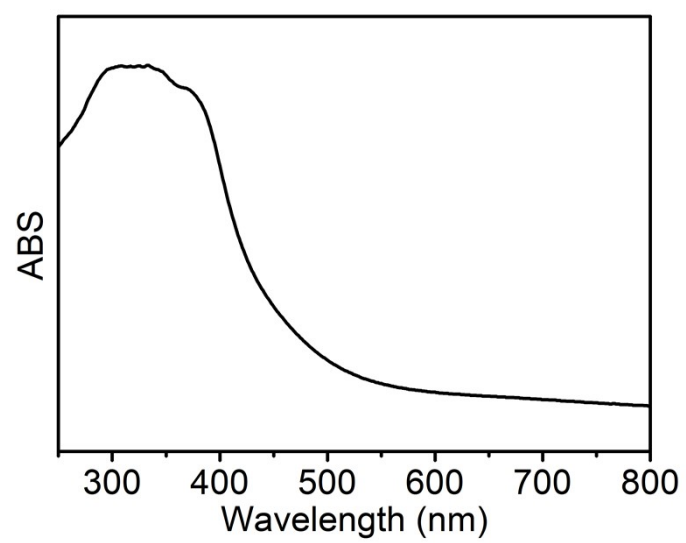

Figure S3. Solid state diffuse reflectance spectrum of AgNCs.

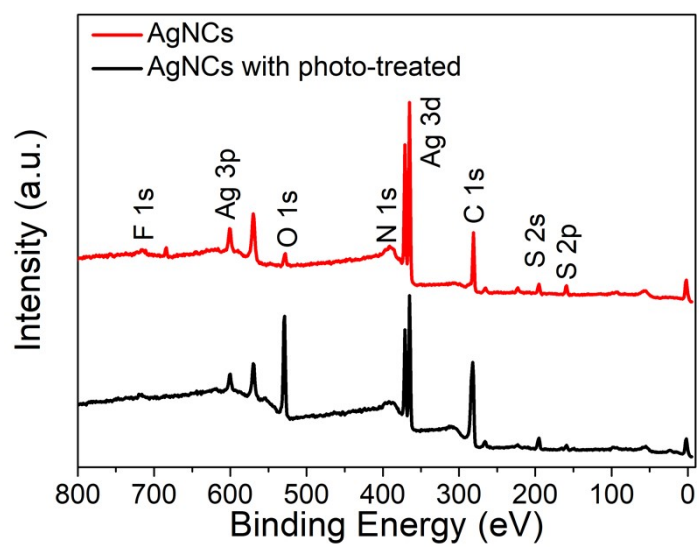

Figure S4. XPS survey spectrum of AgNCs and AgNCs with photo-treated.

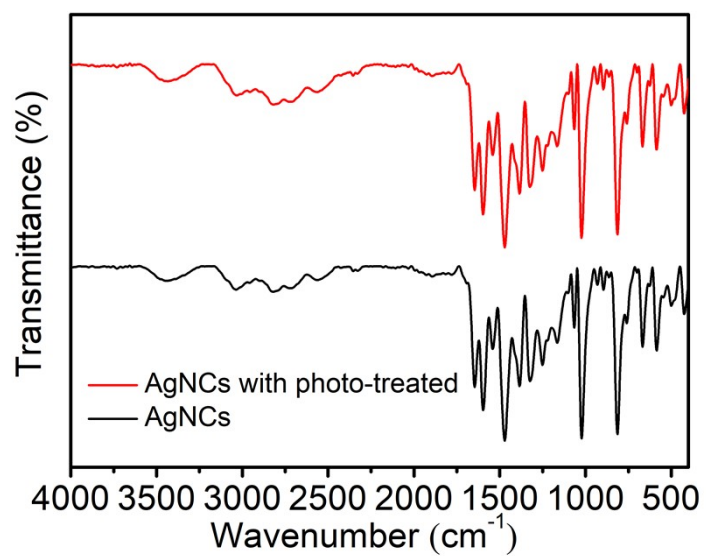

Figure S5. FT-IR spectra of AgNCs and AgNCs with photo-treated.

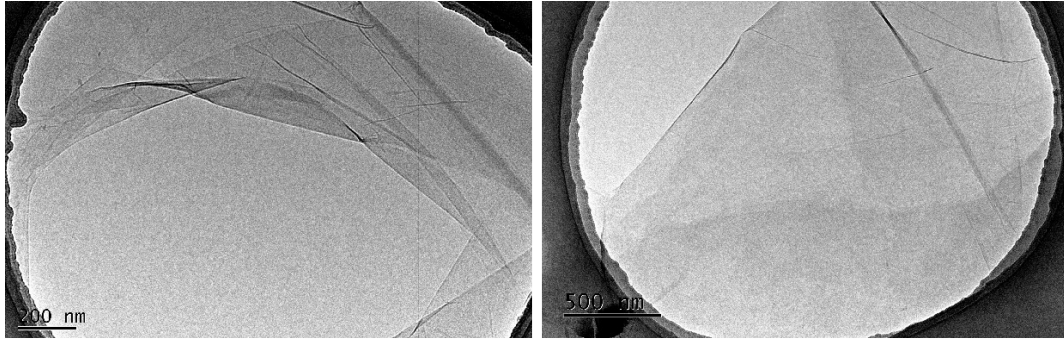

Figure S6. TEM images of GO.

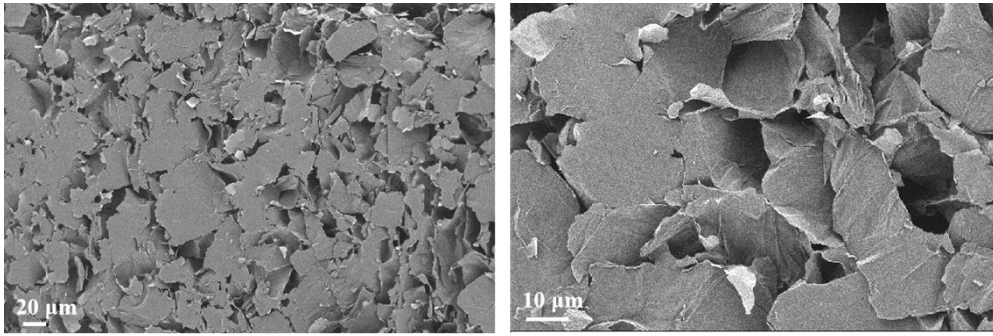

Figure S7. SEM images of AgNCs@GO.

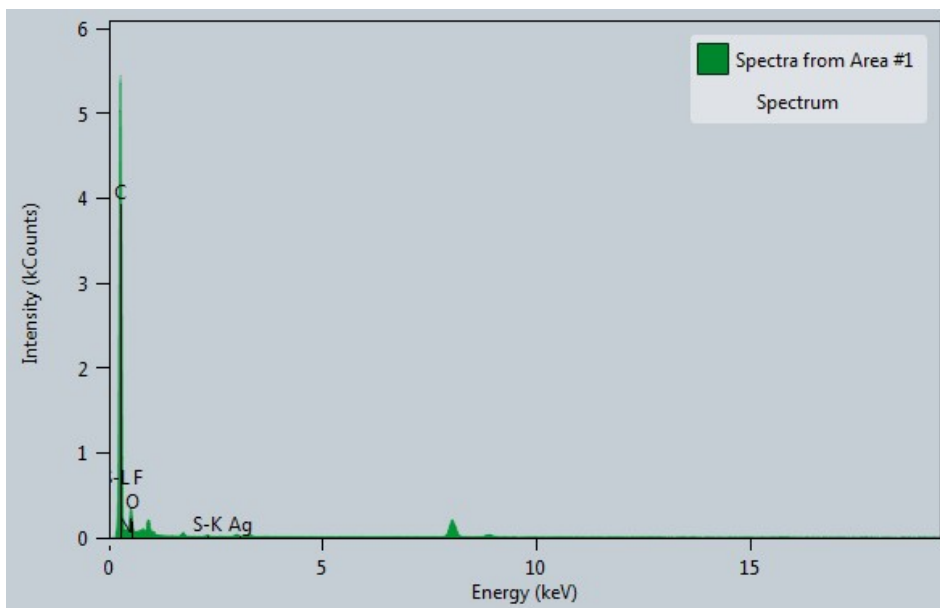

Figure S8. EDS elemental analysis of AgNCs@GO.



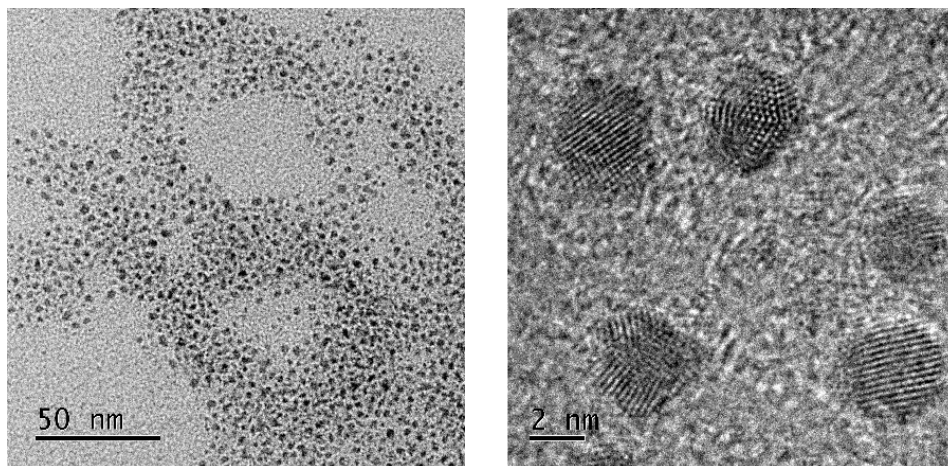

Figure S9. TEM images of AgNCs.

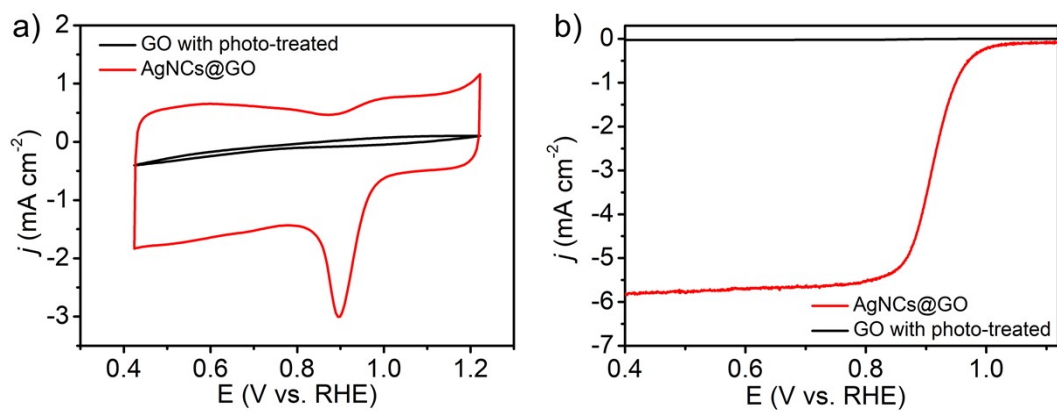

Figure S10. a), b). CV and LSV curves of GO with photo-treated and AgNCs@GO in O<sub>2</sub> saturated 0.1 M KOH.

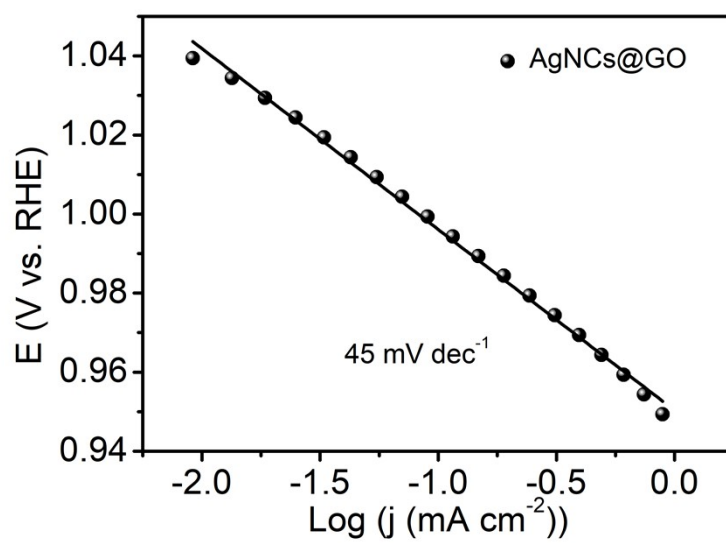

Figure S11. Tafel plots of AgNCs@GO.

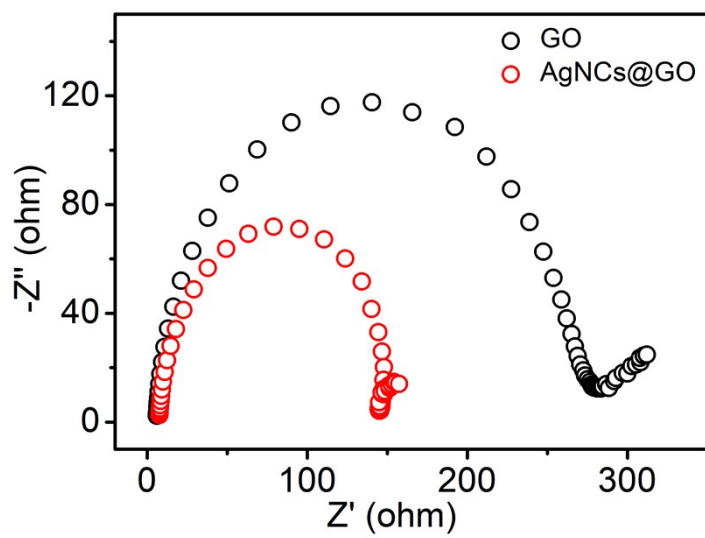

Figure S12. EIS plots of GO and AgNCs@GO.

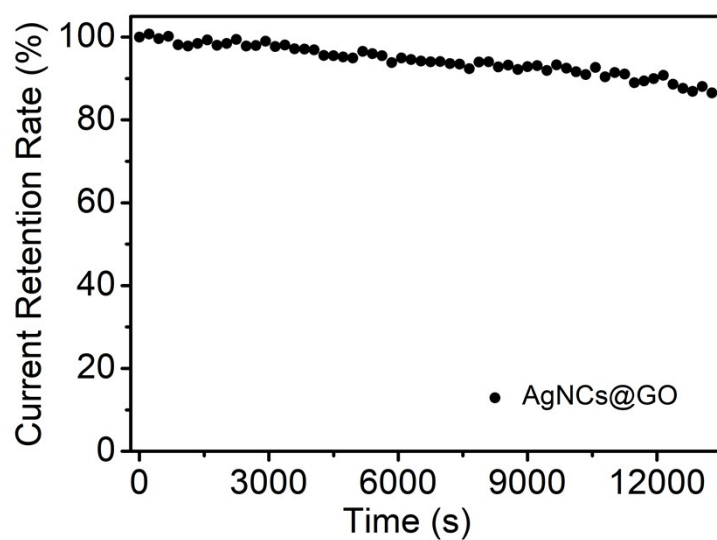

Figure S13. ORR chronoamperometric stability of AgNCs@GO in air-saturated 0.1 M KOH. Applied potential: 0.9 V vs. RHE.

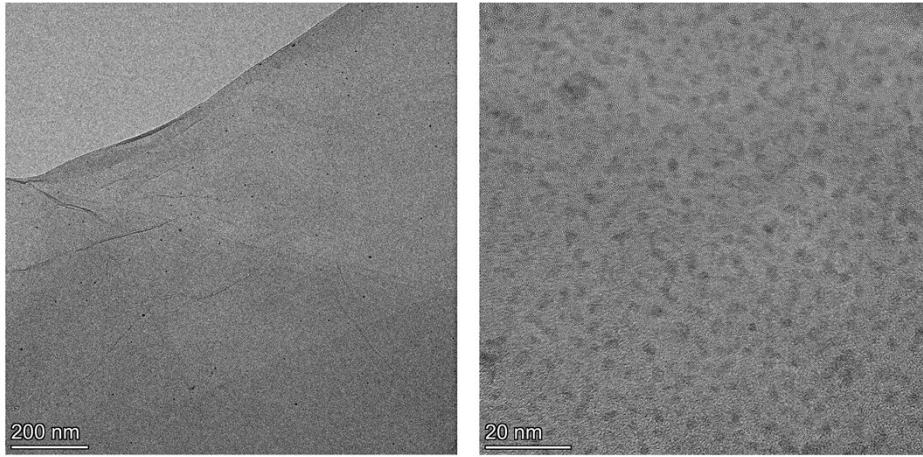

Figure S14. TEM images of AgNCs@GO after ORR.

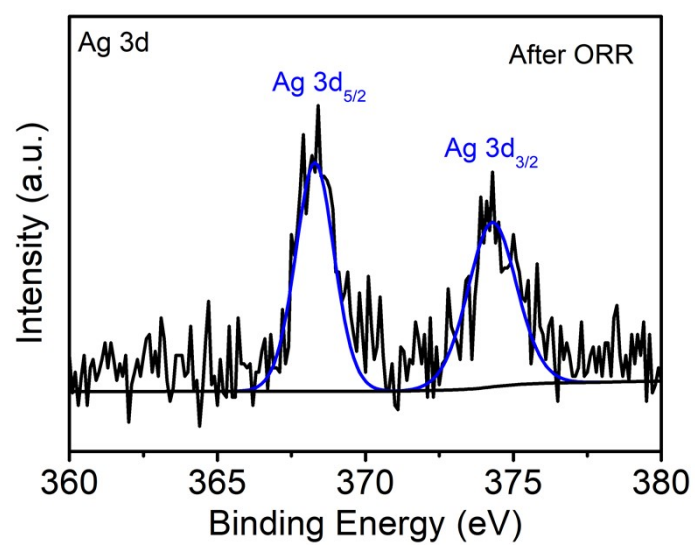

Figure S15. High resolution XPS spectra of Ag 3d of AgNCs@GO after ORR.

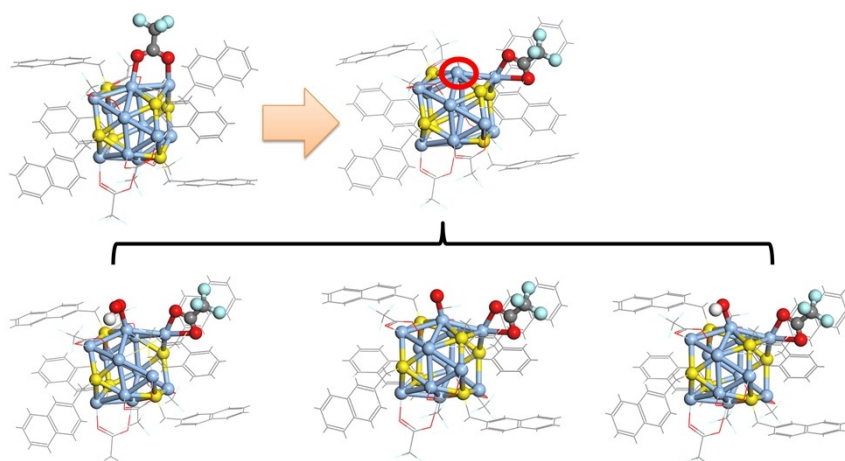

Figure S16. The deformation process of A12 clusters in oxygen reduction reactions.



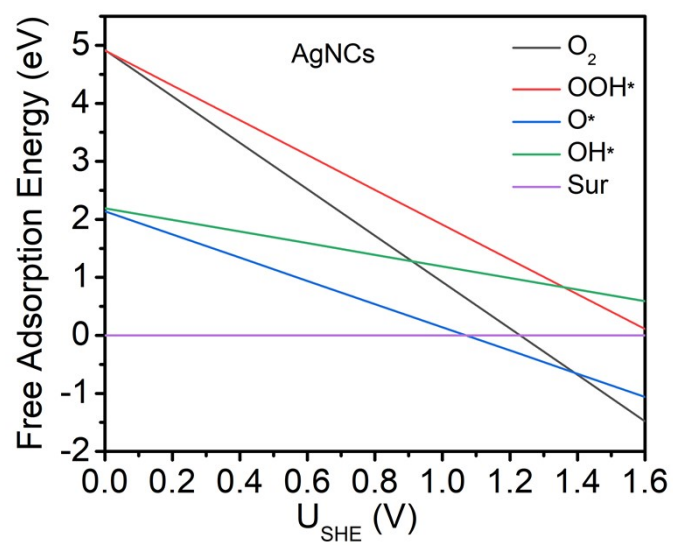

Figure S17. The free adsorption energy of intermediate on the surface of AgNCs.

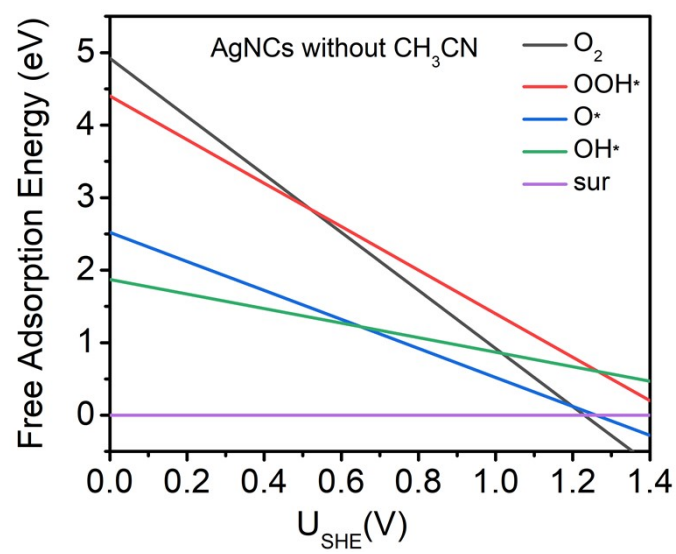

Figure S18. The free adsorption energy of intermediate on the surface of AgNCs without CH<sub>3</sub>CN.

Table S1. Comparison of ORR performance of AgNCs@GO in this work with other reported catalysts. All catalysts were tested with a rotation speed of 1600 rpm.

| Sample                                                                       | Electrolyte             | Onset potential (V) | Half-wave potential (V) | Tafel Slope (mV dec <sup>-1</sup> ) | Ref       |
|------------------------------------------------------------------------------|-------------------------|---------------------|-------------------------|-------------------------------------|-----------|
| Pd <sub>8</sub>                                                              | 0.1 M KOH               | 1.0                 | 0.9                     | 65                                  | 6         |
| Pd <sub>2</sub>                                                              | 0.1 M KOH               | 0.88                | 0.75                    | 80.4                                | 6         |
| Ag <sub>22</sub> (dppf) <sub>3</sub> (SAdm) <sub>12</sub> /C                 | 0.1 M KOH               | 0.82                | 0.63                    | -                                   | 7         |
| Au <sub>1</sub> Ag <sub>21</sub> (dppf) <sub>3</sub> (SAdm) <sub>12</sub> /C | 0.1 M KOH               | 0.86                | 0.66                    | -                                   | 7         |
| Fe-N-C/Pd <sub>NC</sub>                                                      | 0.1 M HClO <sub>4</sub> | 0.97                | 0.87                    | 51.1                                | 8         |
| Sn <sub>x</sub> NC                                                           | 0.1 M HClO <sub>4</sub> | 0.92                | 0.79                    | 123                                 | 9         |
| FeNCs                                                                        | 0.1 M KOH               | 1.0                 | 0.88                    | -                                   | 10        |
| AgNCs@GO                                                                     | 0.1 M KOH               | 1.0                 | 0.91                    | 45                                  | This work |

Table S2. CF<sub>3</sub>CO<sub>2</sub> deformation.

| AtomType | X           | Y           | Z           |
|----------|-------------|-------------|-------------|
| H        | 17.41363654 | 10.73075954 | 24.32768046 |
| H        | 15.44726814 | 11.046732   | 22.84929513 |
| H        | 19.76394785 | 9.37947023  | 20.97287178 |
| H        | 19.56300709 | 9.87986104  | 23.3929646  |
| H        | 16.77019358 | 9.59064373  | 17.2318983  |
| H        | 14.42166504 | 10.9175285  | 20.59874653 |
| H        | 18.74496802 | 9.2919429   | 18.71178925 |
| H        | 18.62357752 | 15.04566469 | 6.08842492  |
| H        | 17.84330682 | 13.37440953 | 7.74792015  |
| H        | 21.0259367  | 16.97660801 | 9.10748094  |
| H        | 20.21148248 | 16.84448986 | 6.76743596  |
| H        | 17.82879051 | 12.51382335 | 10.07378965 |
| H        | 20.25499454 | 14.42670469 | 13.08592468 |
| H        | 21.06970659 | 16.06703308 | 11.41290038 |
| H        | 11.96743765 | 18.08799248 | 5.86538404  |
| H        | 13.92470615 | 18.1682994  | 7.3893629   |
| H        | 9.33980655  | 19.11933538 | 9.12899136  |
| H        | 9.67756769  | 18.55455547 | 6.73593878  |
| H        | 12.23722025 | 19.58553142 | 12.91712433 |
| H        | 14.84801603 | 18.46116414 | 9.66983109  |
| H        | 10.28220748 | 19.53202692 | 11.38433128 |
| H        | 13.02913925 | 10.58449758 | 5.68810477  |
| H        | 12.02175298 | 12.22739868 | 7.25115895  |
| H        | 13.72894003 | 7.85390287  | 8.95467638  |
| H        | 13.8880364  | 8.4030229   | 6.53948396  |
| H        | 12.00189255 | 10.11247345 | 12.81111001 |
| H        | 11.39230787 | 12.87866912 | 9.55764859  |

|   |             |             |             |
|---|-------------|-------------|-------------|
| H | 13.02787816 | 8.4750825   | 11.25252038 |
| H | 10.30712508 | 14.24028877 | 24.3217206  |
| H | 11.13124541 | 15.94978506 | 22.72460997 |
| H | 8.19413515  | 12.23292933 | 21.14052951 |
| H | 8.83834599  | 12.38602146 | 23.53253424 |
| H | 9.13069655  | 14.83905711 | 17.23220944 |
| H | 11.27883147 | 16.81926991 | 20.40918588 |
| H | 8.29576066  | 13.13645141 | 18.8318485  |
| H | 16.03302911 | 18.99256855 | 24.59142923 |
| H | 17.05964504 | 17.3443388  | 23.03951382 |
| H | 15.34472786 | 21.70882596 | 21.30770444 |
| H | 15.17677126 | 21.16815668 | 23.72460365 |
| H | 17.12807223 | 19.43984216 | 17.4826616  |
| H | 17.74707771 | 16.71322784 | 20.76754152 |
| H | 16.05631652 | 21.06847211 | 19.0142852  |
| H | 18.65083411 | 17.38649853 | 17.28880226 |
| H | 18.64123    | 16.16308024 | 18.60230147 |
| H | 14.33644115 | 9.85083055  | 17.03481674 |
| H | 13.33693984 | 10.40508919 | 18.42024564 |
| H | 10.25048818 | 17.01778962 | 16.84923827 |
| H | 11.24773053 | 17.78547879 | 18.1356275  |
| H | 10.54673395 | 13.40482971 | 11.79804593 |
| H | 18.039156   | 11.51664748 | 12.32084959 |
| H | 15.78059918 | 18.96537086 | 11.87847912 |
| H | 10.6422626  | 12.17273269 | 13.10800462 |
| H | 14.70616053 | 19.55367746 | 13.20262223 |
| H | 19.0916313  | 12.28723881 | 13.55626791 |
| O | 18.25236538 | 13.56054615 | 19.31135416 |
| O | 16.43216269 | 13.89544838 | 20.62014877 |

|    |             |             |             |
|----|-------------|-------------|-------------|
| O  | 13.57824099 | 19.41612603 | 17.70940482 |
| O  | 13.07908306 | 19.56285032 | 15.48008322 |
| O  | 10.72504399 | 11.71635692 | 17.49808251 |
| O  | 11.19528836 | 11.02893386 | 15.36510944 |
| O  | 10.32496758 | 16.2837501  | 12.17329502 |
| O  | 9.76172581  | 15.8252083  | 14.34502243 |
| O  | 15.60638721 | 10.0937293  | 12.59150415 |
| O  | 16.04344396 | 9.88896381  | 14.83050942 |
| O  | 17.99531006 | 17.48503285 | 12.07267463 |
| O  | 18.40700914 | 17.81277347 | 14.28802192 |
| Ag | 17.48240547 | 14.55183657 | 15.49600481 |
| Ag | 14.71610853 | 17.5184435  | 17.61025249 |
| Ag | 13.30983475 | 17.28702999 | 15.10958611 |
| Ag | 11.92825052 | 13.59446739 | 17.49060273 |
| Ag | 13.07931831 | 12.3906163  | 15.14810979 |
| Ag | 16.36377392 | 13.35906682 | 18.07549238 |
| Ag | 11.82502409 | 14.90008572 | 14.91829544 |
| Ag | 14.54164473 | 12.02114859 | 12.74224519 |
| Ag | 15.91373553 | 12.18190286 | 15.40564477 |
| Ag | 16.87553088 | 15.60273359 | 12.6914674  |
| Ag | 16.12910558 | 17.00791574 | 15.11480033 |
| Ag | 12.50474337 | 16.29540694 | 12.50277578 |
| S  | 16.63377735 | 16.02166183 | 17.31706738 |
| S  | 12.43974752 | 15.98219226 | 17.08253681 |
| S  | 14.34264474 | 12.26665236 | 17.2934854  |
| S  | 12.64577959 | 13.53293812 | 12.95981436 |
| S  | 16.88708426 | 13.30442816 | 13.42327505 |
| S  | 14.73950341 | 17.1360523  | 13.04746806 |
| F  | 17.95882569 | 13.99179571 | 22.82303094 |

|   |             |             |             |
|---|-------------|-------------|-------------|
| F | 19.54830661 | 12.96201625 | 21.71607971 |
| F | 19.30180955 | 15.13728689 | 21.51886761 |
| F | 13.61807144 | 22.16206613 | 17.63985872 |
| F | 12.54046293 | 22.14656501 | 15.73224663 |
| F | 11.52804957 | 21.47272054 | 17.56391644 |
| F | 8.49133987  | 10.2345339  | 17.44406104 |
| F | 8.90126044  | 9.63684681  | 15.37683963 |
| F | 10.0501649  | 8.74004465  | 17.02468872 |
| F | 7.98926583  | 17.66938287 | 12.03905403 |
| F | 7.32391111  | 16.80284135 | 13.93935889 |
| F | 7.4672063   | 15.53365068 | 12.15133488 |
| F | 15.38165422 | 7.38145631  | 12.56658017 |
| F | 16.28687091 | 7.25340425  | 14.5582053  |
| F | 17.51110278 | 7.86663122  | 12.8361842  |
| F | 20.01131006 | 19.1919675  | 11.49814456 |
| F | 20.31356607 | 19.59692177 | 13.62944126 |
| F | 18.54984201 | 20.41620444 | 12.59887486 |
| C | 17.50030561 | 17.95626029 | 19.03645813 |
| C | 18.05582176 | 16.94119629 | 18.09444665 |
| C | 16.30795235 | 19.8396661  | 20.78298032 |
| C | 17.65969357 | 13.77340789 | 20.42381465 |
| C | 17.0151994  | 19.20320144 | 18.5437256  |
| C | 17.38273352 | 17.66601112 | 20.3825283  |
| C | 16.7997015  | 18.58780577 | 21.2850058  |
| C | 18.6187959  | 13.94807676 | 21.63576364 |
| C | 16.43449555 | 20.11809925 | 19.39632296 |
| C | 16.11207929 | 19.21760066 | 23.52624535 |
| C | 16.68408921 | 18.30113645 | 22.66946375 |
| C | 15.72144062 | 20.7575787  | 21.69068992 |

|   |             |             |             |
|---|-------------|-------------|-------------|
| C | 15.62797265 | 20.45351436 | 23.03358972 |
| C | 10.27839467 | 15.93277503 | 18.72609972 |
| C | 10.90336905 | 16.83323207 | 17.71132171 |
| C | 9.28831981  | 14.00849456 | 20.55396258 |
| C | 13.17870724 | 19.99622182 | 16.65793418 |
| C | 9.4211564   | 14.88103265 | 18.28567743 |
| C | 10.61386641 | 16.0218063  | 20.06559669 |
| C | 10.13434644 | 15.07705527 | 21.00857734 |
| C | 12.71613683 | 21.46760477 | 16.89118802 |
| C | 8.93965339  | 13.94704265 | 19.17873859 |
| C | 10.02641238 | 14.18577301 | 23.26847434 |
| C | 10.48502809 | 15.13823986 | 22.38237082 |
| C | 8.83282618  | 13.04660421 | 21.49152338 |
| C | 9.19428406  | 13.13258671 | 22.82025039 |
| C | 15.46315103 | 10.26828664 | 18.83163213 |
| C | 14.30787184 | 10.50207346 | 17.91604757 |
| C | 17.71303606 | 9.90734691  | 20.51451086 |
| C | 10.57805291 | 11.00571651 | 16.46172344 |
| C | 16.70207066 | 9.81408948  | 18.29956233 |
| C | 15.3636051  | 10.54666846 | 20.18539488 |
| C | 16.46740018 | 10.37352281 | 21.05661213 |
| C | 9.48170368  | 9.89971297  | 16.57613039 |
| C | 17.79427145 | 9.64167608  | 19.12187397 |
| C | 17.48182383 | 10.48763978 | 23.2650572  |
| C | 16.38652599 | 10.66313057 | 22.44420826 |
| C | 18.81608548 | 9.72962452  | 21.38720333 |
| C | 18.70217006 | 10.00832105 | 22.73406922 |
| C | 11.65242933 | 11.61433635 | 11.27718329 |
| C | 11.16956707 | 12.62790099 | 12.26043283 |



|   |             |             |             |
|---|-------------|-------------|-------------|
| C | 12.78177661 | 9.72511999  | 9.49582815  |
| C | 9.53832473  | 16.18893209 | 13.16282093 |
| C | 12.11235586 | 10.3513547  | 11.75003439 |
| C | 11.74298085 | 11.91114442 | 9.92886632  |
| C | 12.29682954 | 10.98603814 | 9.00753289  |
| C | 8.06025232  | 16.56082399 | 12.82809913 |
| C | 12.66429034 | 9.43546984  | 10.88136255 |
| C | 12.95994083 | 10.35606175 | 6.75322204  |
| C | 12.39912019 | 11.27061176 | 7.62058496  |
| C | 13.35651702 | 8.80919312  | 8.57784301  |
| C | 13.44486644 | 9.11715202  | 7.23578408  |
| C | 18.97994602 | 13.36571508 | 11.67816013 |
| C | 18.40338013 | 12.47149596 | 12.72310227 |
| C | 19.90809047 | 15.24636853 | 9.77662771  |
| C | 15.93312849 | 9.47590288  | 13.64872455 |
| C | 19.90929549 | 14.37783766 | 12.05035775 |
| C | 18.54201657 | 13.29025935 | 10.36618173 |
| C | 18.98685021 | 14.21495551 | 9.38802033  |
| C | 16.27473665 | 7.97177821  | 13.40939104 |
| C | 20.36001569 | 15.28904587 | 11.12217575 |
| C | 18.97499682 | 15.09310389 | 7.12061986  |
| C | 18.53928627 | 14.1637398  | 8.0417186   |
| C | 20.333825   | 16.18726434 | 8.80525499  |
| C | 19.87766368 | 16.11298163 | 7.50546902  |
| C | 13.66803509 | 19.002085   | 11.38267189 |
| C | 14.79505987 | 18.86910452 | 12.35064625 |
| C | 11.44035524 | 18.97639682 | 9.63784217  |
| C | 18.52190974 | 18.07459299 | 13.0463013  |
| C | 12.36441793 | 19.3203791  | 11.86402469 |

|                                                 |             |             |             |
|-------------------------------------------------|-------------|-------------|-------------|
| C                                               | 13.84946887 | 18.70683119 | 10.04262596 |
| C                                               | 12.75696503 | 18.69102237 | 9.13960844  |
| C                                               | 19.3763416  | 19.32865987 | 12.6883623  |
| C                                               | 11.28265096 | 19.30535885 | 11.01041704 |
| C                                               | 11.83058938 | 18.33149221 | 6.92055612  |
| C                                               | 12.91991392 | 18.37623492 | 7.76520341  |
| C                                               | 10.34138907 | 18.91613843 | 8.74366521  |
| C                                               | 10.53141217 | 18.59897634 | 7.41436779  |
| <hr/>                                           |             |             |             |
| OOH-CF <sub>3</sub> CO <sub>2</sub> deformation |             |             |             |
| <hr/>                                           |             |             |             |
| AtomType                                        | X           | Y           | Z           |
| <hr/>                                           |             |             |             |
| H                                               | 19.52066591 | 16.96006515 | 15.04197657 |
| H                                               | 17.41363654 | 10.73075954 | 24.32768046 |
| H                                               | 15.44726814 | 11.046732   | 22.84929513 |
| H                                               | 19.76394785 | 9.37947023  | 20.97287178 |
| H                                               | 19.56300709 | 9.87986104  | 23.3929646  |
| H                                               | 16.77019358 | 9.59064373  | 17.2318983  |
| H                                               | 14.42166504 | 10.9175285  | 20.59874653 |
| H                                               | 18.74496802 | 9.2919429   | 18.71178925 |
| H                                               | 18.62357752 | 15.04566469 | 6.08842492  |
| H                                               | 17.84330682 | 13.37440953 | 7.74792015  |
| H                                               | 21.0259367  | 16.97660801 | 9.10748094  |
| H                                               | 20.21148248 | 16.84448986 | 6.76743596  |
| H                                               | 17.82879051 | 12.51382335 | 10.07378965 |
| H                                               | 20.25499454 | 14.42670469 | 13.08592468 |
| H                                               | 21.06970659 | 16.06703308 | 11.41290038 |
| H                                               | 11.96743765 | 18.08799248 | 5.86538404  |
| H                                               | 13.92470615 | 18.1682994  | 7.3893629   |
| H                                               | 9.33980655  | 19.11933538 | 9.12899136  |
| H                                               | 9.67756769  | 18.55455547 | 6.73593878  |

|   |             |             |             |
|---|-------------|-------------|-------------|
| H | 12.23722025 | 19.58553142 | 12.91712433 |
| H | 14.84801603 | 18.46116414 | 9.66983109  |
| H | 10.28220748 | 19.53202692 | 11.38433128 |
| H | 13.02913925 | 10.58449758 | 5.68810477  |
| H | 12.02175298 | 12.22739868 | 7.25115895  |
| H | 13.72894003 | 7.85390287  | 8.95467638  |
| H | 13.8880364  | 8.4030229   | 6.53948396  |
| H | 12.00189255 | 10.11247345 | 12.81111001 |
| H | 11.39230787 | 12.87866912 | 9.55764859  |
| H | 13.02787816 | 8.4750825   | 11.25252038 |
| H | 10.30712508 | 14.24028877 | 24.3217206  |
| H | 11.13124541 | 15.94978506 | 22.72460997 |
| H | 8.19413515  | 12.23292933 | 21.14052951 |
| H | 8.83834599  | 12.38602146 | 23.53253424 |
| H | 9.13069655  | 14.83905711 | 17.23220944 |
| H | 11.27883147 | 16.81926991 | 20.40918588 |
| H | 8.29576066  | 13.13645141 | 18.8318485  |
| H | 16.03302911 | 18.99256855 | 24.59142923 |
| H | 17.05964504 | 17.3443388  | 23.03951382 |
| H | 15.34472786 | 21.70882596 | 21.30770444 |
| H | 15.17677126 | 21.16815668 | 23.72460365 |
| H | 17.12807223 | 19.43984216 | 17.4826616  |
| H | 17.74707771 | 16.71322784 | 20.76754152 |
| H | 16.05631652 | 21.06847211 | 19.0142852  |
| H | 18.65083411 | 17.38649853 | 17.28880226 |
| H | 18.64123    | 16.16308024 | 18.60230147 |
| H | 14.33644115 | 9.85083055  | 17.03481674 |
| H | 13.33693984 | 10.40508919 | 18.42024564 |
| H | 10.25048818 | 17.01778962 | 16.84923827 |

|    |             |             |             |
|----|-------------|-------------|-------------|
| H  | 11.24773053 | 17.78547879 | 18.1356275  |
| H  | 10.54673395 | 13.40482971 | 11.79804593 |
| H  | 18.039156   | 11.51664748 | 12.32084959 |
| H  | 15.78059918 | 18.96537086 | 11.87847912 |
| H  | 10.6422626  | 12.17273269 | 13.10800462 |
| H  | 14.70616053 | 19.55367746 | 13.20262223 |
| H  | 19.0916313  | 12.28723881 | 13.55626791 |
| O  | 19.79810307 | 15.1183066  | 15.48863947 |
| O  | 20.22592953 | 16.40341015 | 15.53833723 |
| O  | 18.25236538 | 13.56054615 | 19.31135416 |
| O  | 16.43216269 | 13.89544838 | 20.62014877 |
| O  | 13.57824099 | 19.41612603 | 17.70940482 |
| O  | 13.07908306 | 19.56285032 | 15.48008322 |
| O  | 10.72504399 | 11.71635692 | 17.49808251 |
| O  | 11.19528836 | 11.02893386 | 15.36510944 |
| O  | 10.32496758 | 16.2837501  | 12.17329502 |
| O  | 9.76172581  | 15.8252083  | 14.34502243 |
| O  | 15.60638721 | 10.0937293  | 12.59150415 |
| O  | 16.04344396 | 9.88896381  | 14.83050942 |
| O  | 17.99531006 | 17.48503285 | 12.07267463 |
| O  | 18.40700914 | 17.81277347 | 14.28802192 |
| Ag | 17.48240547 | 14.55183657 | 15.49600481 |
| Ag | 14.71610853 | 17.5184435  | 17.61025249 |
| Ag | 13.30983475 | 17.28702999 | 15.10958611 |
| Ag | 11.92825052 | 13.59446739 | 17.49060273 |
| Ag | 13.07931831 | 12.3906163  | 15.14810979 |
| Ag | 16.36377392 | 13.35906682 | 18.07549238 |
| Ag | 11.82502409 | 14.90008572 | 14.91829544 |
| Ag | 14.54164473 | 12.02114859 | 12.74224519 |

|    |             |             |             |
|----|-------------|-------------|-------------|
| Ag | 15.91373553 | 12.18190286 | 15.40564477 |
| Ag | 16.87553088 | 15.60273359 | 12.6914674  |
| Ag | 16.12910558 | 17.00791574 | 15.11480033 |
| Ag | 12.50474337 | 16.29540694 | 12.50277578 |
| S  | 16.63377735 | 16.02166183 | 17.31706738 |
| S  | 12.43974752 | 15.98219226 | 17.08253681 |
| S  | 14.34264474 | 12.26665236 | 17.2934854  |
| S  | 12.64577959 | 13.53293812 | 12.95981436 |
| S  | 16.88708426 | 13.30442816 | 13.42327505 |
| S  | 14.73950341 | 17.1360523  | 13.04746806 |
| F  | 17.95882569 | 13.99179571 | 22.82303094 |
| F  | 19.54830661 | 12.96201625 | 21.71607971 |
| F  | 19.30180955 | 15.13728689 | 21.51886761 |
| F  | 13.61807144 | 22.16206613 | 17.63985872 |
| F  | 12.54046293 | 22.14656501 | 15.73224663 |
| F  | 11.52804957 | 21.47272054 | 17.56391644 |
| F  | 8.49133987  | 10.2345339  | 17.44406104 |
| F  | 8.90126044  | 9.63684681  | 15.37683963 |
| F  | 10.0501649  | 8.74004465  | 17.02468872 |
| F  | 7.98926583  | 17.66938287 | 12.03905403 |
| F  | 7.32391111  | 16.80284135 | 13.93935889 |
| F  | 7.4672063   | 15.53365068 | 12.15133488 |
| F  | 15.38165422 | 7.38145631  | 12.56658017 |
| F  | 16.28687091 | 7.25340425  | 14.5582053  |
| F  | 17.51110278 | 7.86663122  | 12.8361842  |
| F  | 20.01131006 | 19.1919675  | 11.49814456 |
| F  | 20.31356607 | 19.59692177 | 13.62944126 |
| F  | 18.54984201 | 20.41620444 | 12.59887486 |
| C  | 17.50030561 | 17.95626029 | 19.03645813 |

|   |             |             |             |
|---|-------------|-------------|-------------|
| C | 18.05582176 | 16.94119629 | 18.09444665 |
| C | 16.30795235 | 19.8396661  | 20.78298032 |
| C | 17.65969357 | 13.77340789 | 20.42381465 |
| C | 17.0151994  | 19.20320144 | 18.5437256  |
| C | 17.38273352 | 17.66601112 | 20.3825283  |
| C | 16.7997015  | 18.58780577 | 21.2850058  |
| C | 18.6187959  | 13.94807676 | 21.63576364 |
| C | 16.43449555 | 20.11809925 | 19.39632296 |
| C | 16.11207929 | 19.21760066 | 23.52624535 |
| C | 16.68408921 | 18.30113645 | 22.66946375 |
| C | 15.72144062 | 20.7575787  | 21.69068992 |
| C | 15.62797265 | 20.45351436 | 23.03358972 |
| C | 10.27839467 | 15.93277503 | 18.72609972 |
| C | 10.90336905 | 16.83323207 | 17.71132171 |
| C | 9.28831981  | 14.00849456 | 20.55396258 |
| C | 13.17870724 | 19.99622182 | 16.65793418 |
| C | 9.4211564   | 14.88103265 | 18.28567743 |
| C | 10.61386641 | 16.0218063  | 20.06559669 |
| C | 10.13434644 | 15.07705527 | 21.00857734 |
| C | 12.71613683 | 21.46760477 | 16.89118802 |
| C | 8.93965339  | 13.94704265 | 19.17873859 |
| C | 10.02641238 | 14.18577301 | 23.26847434 |
| C | 10.48502809 | 15.13823986 | 22.38237082 |
| C | 8.83282618  | 13.04660421 | 21.49152338 |
| C | 9.19428406  | 13.13258671 | 22.82025039 |
| C | 15.46315103 | 10.26828664 | 18.83163213 |
| C | 14.30787184 | 10.50207346 | 17.91604757 |
| C | 17.71303606 | 9.90734691  | 20.51451086 |
| C | 10.57805291 | 11.00571651 | 16.46172344 |

|   |             |             |             |
|---|-------------|-------------|-------------|
| C | 16.70207066 | 9.81408948  | 18.29956233 |
| C | 15.3636051  | 10.54666846 | 20.18539488 |
| C | 16.46740018 | 10.37352281 | 21.05661213 |
| C | 9.48170368  | 9.89971297  | 16.57613039 |
| C | 17.79427145 | 9.64167608  | 19.12187397 |
| C | 17.48182383 | 10.48763978 | 23.2650572  |
| C | 16.38652599 | 10.66313057 | 22.44420826 |
| C | 18.81608548 | 9.72962452  | 21.38720333 |
| C | 18.70217006 | 10.00832105 | 22.73406922 |
| C | 11.65242933 | 11.61433635 | 11.27718329 |
| C | 11.16956707 | 12.62790099 | 12.26043283 |
| C | 12.78177661 | 9.72511999  | 9.49582815  |
| C | 9.53832473  | 16.18893209 | 13.16282093 |
| C | 12.11235586 | 10.3513547  | 11.75003439 |
| C | 11.74298085 | 11.91114442 | 9.92886632  |
| C | 12.29682954 | 10.98603814 | 9.00753289  |
| C | 8.06025232  | 16.56082399 | 12.82809913 |
| C | 12.66429034 | 9.43546984  | 10.88136255 |
| C | 12.95994083 | 10.35606175 | 6.75322204  |
| C | 12.39912019 | 11.27061176 | 7.62058496  |
| C | 13.35651702 | 8.80919312  | 8.57784301  |
| C | 13.44486644 | 9.11715202  | 7.23578408  |
| C | 18.97994602 | 13.36571508 | 11.67816013 |
| C | 18.40338013 | 12.47149596 | 12.72310227 |
| C | 19.90809047 | 15.24636853 | 9.77662771  |
| C | 15.93312849 | 9.47590288  | 13.64872455 |
| C | 19.90929549 | 14.37783766 | 12.05035775 |
| C | 18.54201657 | 13.29025935 | 10.36618173 |
| C | 18.98685021 | 14.21495551 | 9.38802033  |

|   |             |             |             |
|---|-------------|-------------|-------------|
| C | 16.27473665 | 7.97177821  | 13.40939104 |
| C | 20.36001569 | 15.28904587 | 11.12217575 |
| C | 18.97499682 | 15.09310389 | 7.12061986  |
| C | 18.53928627 | 14.1637398  | 8.0417186   |
| C | 20.333825   | 16.18726434 | 8.80525499  |
| C | 19.87766368 | 16.11298163 | 7.50546902  |
| C | 13.66803509 | 19.002085   | 11.38267189 |
| C | 14.79505987 | 18.86910452 | 12.35064625 |
| C | 11.44035524 | 18.97639682 | 9.63784217  |
| C | 18.52190974 | 18.07459299 | 13.0463013  |
| C | 12.36441793 | 19.3203791  | 11.86402469 |
| C | 13.84946887 | 18.70683119 | 10.04262596 |
| C | 12.75696503 | 18.69102237 | 9.13960844  |
| C | 19.3763416  | 19.32865987 | 12.6883623  |
| C | 11.28265096 | 19.30535885 | 11.01041704 |
| C | 11.83058938 | 18.33149221 | 6.92055612  |
| C | 12.91991392 | 18.37623492 | 7.76520341  |
| C | 10.34138907 | 18.91613843 | 8.74366521  |
| C | 10.53141217 | 18.59897634 | 7.41436779  |

---

O-CF<sub>3</sub>CO<sub>2</sub> deformation

---

| AtomType | X           | Y           | Z           |
|----------|-------------|-------------|-------------|
| H        | 17.41363654 | 10.73075954 | 24.32768046 |
| H        | 15.44726814 | 11.046732   | 22.84929513 |
| H        | 19.76394785 | 9.37947023  | 20.97287178 |
| H        | 19.56300709 | 9.87986104  | 23.3929646  |
| H        | 16.77019358 | 9.59064373  | 17.2318983  |
| H        | 14.42166504 | 10.9175285  | 20.59874653 |
| H        | 18.74496802 | 9.2919429   | 18.71178925 |
| H        | 18.62357752 | 15.04566469 | 6.08842492  |



|   |             |             |             |
|---|-------------|-------------|-------------|
| H | 17.84330682 | 13.37440953 | 7.74792015  |
| H | 21.0259367  | 16.97660801 | 9.10748094  |
| H | 20.21148248 | 16.84448986 | 6.76743596  |
| H | 17.82879051 | 12.51382335 | 10.07378965 |
| H | 20.25499454 | 14.42670469 | 13.08592468 |
| H | 21.06970659 | 16.06703308 | 11.41290038 |
| H | 11.96743765 | 18.08799248 | 5.86538404  |
| H | 13.92470615 | 18.1682994  | 7.3893629   |
| H | 9.33980655  | 19.11933538 | 9.12899136  |
| H | 9.67756769  | 18.55455547 | 6.73593878  |
| H | 12.23722025 | 19.58553142 | 12.91712433 |
| H | 14.84801603 | 18.46116414 | 9.66983109  |
| H | 10.28220748 | 19.53202692 | 11.38433128 |
| H | 13.02913925 | 10.58449758 | 5.68810477  |
| H | 12.02175298 | 12.22739868 | 7.25115895  |
| H | 13.72894003 | 7.85390287  | 8.95467638  |
| H | 13.8880364  | 8.4030229   | 6.53948396  |
| H | 12.00189255 | 10.11247345 | 12.81111001 |
| H | 11.39230787 | 12.87866912 | 9.55764859  |
| H | 13.02787816 | 8.4750825   | 11.25252038 |
| H | 10.30712508 | 14.24028877 | 24.3217206  |
| H | 11.13124541 | 15.94978506 | 22.72460997 |
| H | 8.19413515  | 12.23292933 | 21.14052951 |
| H | 8.83834599  | 12.38602146 | 23.53253424 |
| H | 9.13069655  | 14.83905711 | 17.23220944 |
| H | 11.27883147 | 16.81926991 | 20.40918588 |
| H | 8.29576066  | 13.13645141 | 18.8318485  |
| H | 16.03302911 | 18.99256855 | 24.59142923 |
| H | 17.05964504 | 17.3443388  | 23.03951382 |

|   |             |             |             |
|---|-------------|-------------|-------------|
| H | 15.34472786 | 21.70882596 | 21.30770444 |
| H | 15.17677126 | 21.16815668 | 23.72460365 |
| H | 17.12807223 | 19.43984216 | 17.4826616  |
| H | 17.74707771 | 16.71322784 | 20.76754152 |
| H | 16.05631652 | 21.06847211 | 19.0142852  |
| H | 18.65083411 | 17.38649853 | 17.28880226 |
| H | 18.64123    | 16.16308024 | 18.60230147 |
| H | 14.33644115 | 9.85083055  | 17.03481674 |
| H | 13.33693984 | 10.40508919 | 18.42024564 |
| H | 10.25048818 | 17.01778962 | 16.84923827 |
| H | 11.24773053 | 17.78547879 | 18.1356275  |
| H | 10.54673395 | 13.40482971 | 11.79804593 |
| H | 18.039156   | 11.51664748 | 12.32084959 |
| H | 15.78059918 | 18.96537086 | 11.87847912 |
| H | 10.6422626  | 12.17273269 | 13.10800462 |
| H | 14.70616053 | 19.55367746 | 13.20262223 |
| H | 19.0916313  | 12.28723881 | 13.55626791 |
| O | 19.52444275 | 14.5230547  | 15.29504656 |
| O | 18.25236538 | 13.56054615 | 19.31135416 |
| O | 16.43216269 | 13.89544838 | 20.62014877 |
| O | 13.57824099 | 19.41612603 | 17.70940482 |
| O | 13.07908306 | 19.56285032 | 15.48008322 |
| O | 10.72504399 | 11.71635692 | 17.49808251 |
| O | 11.19528836 | 11.02893386 | 15.36510944 |
| O | 10.32496758 | 16.2837501  | 12.17329502 |
| O | 9.76172581  | 15.8252083  | 14.34502243 |
| O | 15.60638721 | 10.0937293  | 12.59150415 |
| O | 16.04344396 | 9.88896381  | 14.83050942 |
| O | 17.99531006 | 17.48503285 | 12.07267463 |

|    |             |             |             |
|----|-------------|-------------|-------------|
| O  | 18.40700914 | 17.81277347 | 14.28802192 |
| Ag | 17.48240547 | 14.55183657 | 15.49600481 |
| Ag | 14.71610853 | 17.5184435  | 17.61025249 |
| Ag | 13.30983475 | 17.28702999 | 15.10958611 |
| Ag | 11.92825052 | 13.59446739 | 17.49060273 |
| Ag | 13.07931831 | 12.3906163  | 15.14810979 |
| Ag | 16.36377392 | 13.35906682 | 18.07549238 |
| Ag | 11.82502409 | 14.90008572 | 14.91829544 |
| Ag | 14.54164473 | 12.02114859 | 12.74224519 |
| Ag | 15.91373553 | 12.18190286 | 15.40564477 |
| Ag | 16.87553088 | 15.60273359 | 12.6914674  |
| Ag | 16.12910558 | 17.00791574 | 15.11480033 |
| Ag | 12.50474337 | 16.29540694 | 12.50277578 |
| S  | 16.63377735 | 16.02166183 | 17.31706738 |
| S  | 12.43974752 | 15.98219226 | 17.08253681 |
| S  | 14.34264474 | 12.26665236 | 17.2934854  |
| S  | 12.64577959 | 13.53293812 | 12.95981436 |
| S  | 16.88708426 | 13.30442816 | 13.42327505 |
| S  | 14.73950341 | 17.1360523  | 13.04746806 |
| F  | 17.95882569 | 13.99179571 | 22.82303094 |
| F  | 19.54830661 | 12.96201625 | 21.71607971 |
| F  | 19.30180955 | 15.13728689 | 21.51886761 |
| F  | 13.61807144 | 22.16206613 | 17.63985872 |
| F  | 12.54046293 | 22.14656501 | 15.73224663 |
| F  | 11.52804957 | 21.47272054 | 17.56391644 |
| F  | 8.49133987  | 10.2345339  | 17.44406104 |
| F  | 8.90126044  | 9.63684681  | 15.37683963 |
| F  | 10.0501649  | 8.74004465  | 17.02468872 |
| F  | 7.98926583  | 17.66938287 | 12.03905403 |

|   |             |             |             |
|---|-------------|-------------|-------------|
| F | 7.32391111  | 16.80284135 | 13.93935889 |
| F | 7.4672063   | 15.53365068 | 12.15133488 |
| F | 15.38165422 | 7.38145631  | 12.56658017 |
| F | 16.28687091 | 7.25340425  | 14.5582053  |
| F | 17.51110278 | 7.86663122  | 12.8361842  |
| F | 20.01131006 | 19.1919675  | 11.49814456 |
| F | 20.31356607 | 19.59692177 | 13.62944126 |
| F | 18.54984201 | 20.41620444 | 12.59887486 |
| C | 17.50030561 | 17.95626029 | 19.03645813 |
| C | 18.05582176 | 16.94119629 | 18.09444665 |
| C | 16.30795235 | 19.8396661  | 20.78298032 |
| C | 17.65969357 | 13.77340789 | 20.42381465 |
| C | 17.0151994  | 19.20320144 | 18.5437256  |
| C | 17.38273352 | 17.66601112 | 20.3825283  |
| C | 16.7997015  | 18.58780577 | 21.2850058  |
| C | 18.6187959  | 13.94807676 | 21.63576364 |
| C | 16.43449555 | 20.11809925 | 19.39632296 |
| C | 16.11207929 | 19.21760066 | 23.52624535 |
| C | 16.68408921 | 18.30113645 | 22.66946375 |
| C | 15.72144062 | 20.7575787  | 21.69068992 |
| C | 15.62797265 | 20.45351436 | 23.03358972 |
| C | 10.27839467 | 15.93277503 | 18.72609972 |
| C | 10.90336905 | 16.83323207 | 17.71132171 |
| C | 9.28831981  | 14.00849456 | 20.55396258 |
| C | 13.17870724 | 19.99622182 | 16.65793418 |
| C | 9.4211564   | 14.88103265 | 18.28567743 |
| C | 10.61386641 | 16.0218063  | 20.06559669 |
| C | 10.13434644 | 15.07705527 | 21.00857734 |
| C | 12.71613683 | 21.46760477 | 16.89118802 |

|   |             |             |             |
|---|-------------|-------------|-------------|
| C | 8.93965339  | 13.94704265 | 19.17873859 |
| C | 10.02641238 | 14.18577301 | 23.26847434 |
| C | 10.48502809 | 15.13823986 | 22.38237082 |
| C | 8.83282618  | 13.04660421 | 21.49152338 |
| C | 9.19428406  | 13.13258671 | 22.82025039 |
| C | 15.46315103 | 10.26828664 | 18.83163213 |
| C | 14.30787184 | 10.50207346 | 17.91604757 |
| C | 17.71303606 | 9.90734691  | 20.51451086 |
| C | 10.57805291 | 11.00571651 | 16.46172344 |
| C | 16.70207066 | 9.81408948  | 18.29956233 |
| C | 15.3636051  | 10.54666846 | 20.18539488 |
| C | 16.46740018 | 10.37352281 | 21.05661213 |
| C | 9.48170368  | 9.89971297  | 16.57613039 |
| C | 17.79427145 | 9.64167608  | 19.12187397 |
| C | 17.48182383 | 10.48763978 | 23.2650572  |
| C | 16.38652599 | 10.66313057 | 22.44420826 |
| C | 18.81608548 | 9.72962452  | 21.38720333 |
| C | 18.70217006 | 10.00832105 | 22.73406922 |
| C | 11.65242933 | 11.61433635 | 11.27718329 |
| C | 11.16956707 | 12.62790099 | 12.26043283 |
| C | 12.78177661 | 9.72511999  | 9.49582815  |
| C | 9.53832473  | 16.18893209 | 13.16282093 |
| C | 12.11235586 | 10.3513547  | 11.75003439 |
| C | 11.74298085 | 11.91114442 | 9.92886632  |
| C | 12.29682954 | 10.98603814 | 9.00753289  |
| C | 8.06025232  | 16.56082399 | 12.82809913 |
| C | 12.66429034 | 9.43546984  | 10.88136255 |
| C | 12.95994083 | 10.35606175 | 6.75322204  |
| C | 12.39912019 | 11.27061176 | 7.62058496  |

|   |             |             |             |
|---|-------------|-------------|-------------|
| C | 13.35651702 | 8.80919312  | 8.57784301  |
| C | 13.44486644 | 9.11715202  | 7.23578408  |
| C | 18.97994602 | 13.36571508 | 11.67816013 |
| C | 18.40338013 | 12.47149596 | 12.72310227 |
| C | 19.90809047 | 15.24636853 | 9.77662771  |
| C | 15.93312849 | 9.47590288  | 13.64872455 |
| C | 19.90929549 | 14.37783766 | 12.05035775 |
| C | 18.54201657 | 13.29025935 | 10.36618173 |
| C | 18.98685021 | 14.21495551 | 9.38802033  |
| C | 16.27473665 | 7.97177821  | 13.40939104 |
| C | 20.36001569 | 15.28904587 | 11.12217575 |
| C | 18.97499682 | 15.09310389 | 7.12061986  |
| C | 18.53928627 | 14.1637398  | 8.0417186   |
| C | 20.333825   | 16.18726434 | 8.80525499  |
| C | 19.87766368 | 16.11298163 | 7.50546902  |
| C | 13.66803509 | 19.002085   | 11.38267189 |
| C | 14.79505987 | 18.86910452 | 12.35064625 |
| C | 11.44035524 | 18.97639682 | 9.63784217  |
| C | 18.52190974 | 18.07459299 | 13.0463013  |
| C | 12.36441793 | 19.3203791  | 11.86402469 |
| C | 13.84946887 | 18.70683119 | 10.04262596 |
| C | 12.75696503 | 18.69102237 | 9.13960844  |
| C | 19.3763416  | 19.32865987 | 12.6883623  |
| C | 11.28265096 | 19.30535885 | 11.01041704 |
| C | 11.83058938 | 18.33149221 | 6.92055612  |
| C | 12.91991392 | 18.37623492 | 7.76520341  |
| C | 10.34138907 | 18.91613843 | 8.74366521  |
| C | 10.53141217 | 18.59897634 | 7.41436779  |

---

OH-CF<sub>3</sub>CO<sub>2</sub> deformation

---

| AtomType | X           | Y           | Z           |
|----------|-------------|-------------|-------------|
| H        | 19.41570225 | 16.15310469 | 14.96765971 |
| H        | 17.41363654 | 10.73075954 | 24.32768046 |
| H        | 15.44726814 | 11.046732   | 22.84929513 |
| H        | 19.76394785 | 9.37947023  | 20.97287178 |
| H        | 19.56300709 | 9.87986104  | 23.3929646  |
| H        | 16.77019358 | 9.59064373  | 17.2318983  |
| H        | 14.42166504 | 10.9175285  | 20.59874653 |
| H        | 18.74496802 | 9.2919429   | 18.71178925 |
| H        | 18.62357752 | 15.04566469 | 6.08842492  |
| H        | 17.84330682 | 13.37440953 | 7.74792015  |
| H        | 21.0259367  | 16.97660801 | 9.10748094  |
| H        | 20.21148248 | 16.84448986 | 6.76743596  |
| H        | 17.82879051 | 12.51382335 | 10.07378965 |
| H        | 20.25499454 | 14.42670469 | 13.08592468 |
| H        | 21.06970659 | 16.06703308 | 11.41290038 |
| H        | 11.96743765 | 18.08799248 | 5.86538404  |
| H        | 13.92470615 | 18.1682994  | 7.3893629   |
| H        | 9.33980655  | 19.11933538 | 9.12899136  |
| H        | 9.67756769  | 18.55455547 | 6.73593878  |
| H        | 12.23722025 | 19.58553142 | 12.91712433 |
| H        | 14.84801603 | 18.46116414 | 9.66983109  |
| H        | 10.28220748 | 19.53202692 | 11.38433128 |
| H        | 13.02913925 | 10.58449758 | 5.68810477  |
| H        | 12.02175298 | 12.22739868 | 7.25115895  |
| H        | 13.72894003 | 7.85390287  | 8.95467638  |
| H        | 13.8880364  | 8.4030229   | 6.53948396  |
| H        | 12.00189255 | 10.11247345 | 12.81111001 |
| H        | 11.39230787 | 12.87866912 | 9.55764859  |

|   |             |             |             |
|---|-------------|-------------|-------------|
| H | 13.02787816 | 8.4750825   | 11.25252038 |
| H | 10.30712508 | 14.24028877 | 24.3217206  |
| H | 11.13124541 | 15.94978506 | 22.72460997 |
| H | 8.19413515  | 12.23292933 | 21.14052951 |
| H | 8.83834599  | 12.38602146 | 23.53253424 |
| H | 9.13069655  | 14.83905711 | 17.23220944 |
| H | 11.27883147 | 16.81926991 | 20.40918588 |
| H | 8.29576066  | 13.13645141 | 18.8318485  |
| H | 16.03302911 | 18.99256855 | 24.59142923 |
| H | 17.05964504 | 17.3443388  | 23.03951382 |
| H | 15.34472786 | 21.70882596 | 21.30770444 |
| H | 15.17677126 | 21.16815668 | 23.72460365 |
| H | 17.12807223 | 19.43984216 | 17.4826616  |
| H | 17.74707771 | 16.71322784 | 20.76754152 |
| H | 16.05631652 | 21.06847211 | 19.0142852  |
| H | 18.65083411 | 17.38649853 | 17.28880226 |
| H | 18.64123    | 16.16308024 | 18.60230147 |
| H | 14.33644115 | 9.85083055  | 17.03481674 |
| H | 13.33693984 | 10.40508919 | 18.42024564 |
| H | 10.25048818 | 17.01778962 | 16.84923827 |
| H | 11.24773053 | 17.78547879 | 18.1356275  |
| H | 10.54673395 | 13.40482971 | 11.79804593 |
| H | 18.039156   | 11.51664748 | 12.32084959 |
| H | 15.78059918 | 18.96537086 | 11.87847912 |
| H | 10.6422626  | 12.17273269 | 13.10800462 |
| H | 14.70616053 | 19.55367746 | 13.20262223 |
| H | 19.0916313  | 12.28723881 | 13.55626791 |
| O | 19.45978712 | 15.20938908 | 15.23445904 |
| O | 18.25236538 | 13.56054615 | 19.31135416 |



|    |             |             |             |
|----|-------------|-------------|-------------|
| O  | 16.43216269 | 13.89544838 | 20.62014877 |
| O  | 13.57824099 | 19.41612603 | 17.70940482 |
| O  | 13.07908306 | 19.56285032 | 15.48008322 |
| O  | 10.72504399 | 11.71635692 | 17.49808251 |
| O  | 11.19528836 | 11.02893386 | 15.36510944 |
| O  | 10.32496758 | 16.2837501  | 12.17329502 |
| O  | 9.76172581  | 15.8252083  | 14.34502243 |
| O  | 15.60638721 | 10.0937293  | 12.59150415 |
| O  | 16.04344396 | 9.88896381  | 14.83050942 |
| O  | 17.99531006 | 17.48503285 | 12.07267463 |
| O  | 18.40700914 | 17.81277347 | 14.28802192 |
| Ag | 17.48240547 | 14.55183657 | 15.49600481 |
| Ag | 14.71610853 | 17.5184435  | 17.61025249 |
| Ag | 13.30983475 | 17.28702999 | 15.10958611 |
| Ag | 11.92825052 | 13.59446739 | 17.49060273 |
| Ag | 13.07931831 | 12.3906163  | 15.14810979 |
| Ag | 16.36377392 | 13.35906682 | 18.07549238 |
| Ag | 11.82502409 | 14.90008572 | 14.91829544 |
| Ag | 14.54164473 | 12.02114859 | 12.74224519 |
| Ag | 15.91373553 | 12.18190286 | 15.40564477 |
| Ag | 16.87553088 | 15.60273359 | 12.6914674  |
| Ag | 16.12910558 | 17.00791574 | 15.11480033 |
| Ag | 12.50474337 | 16.29540694 | 12.50277578 |
| S  | 16.63377735 | 16.02166183 | 17.31706738 |
| S  | 12.43974752 | 15.98219226 | 17.08253681 |
| S  | 14.34264474 | 12.26665236 | 17.2934854  |
| S  | 12.64577959 | 13.53293812 | 12.95981436 |
| S  | 16.88708426 | 13.30442816 | 13.42327505 |
| S  | 14.73950341 | 17.1360523  | 13.04746806 |

|   |             |             |             |
|---|-------------|-------------|-------------|
| F | 17.95882569 | 13.99179571 | 22.82303094 |
| F | 19.54830661 | 12.96201625 | 21.71607971 |
| F | 19.30180955 | 15.13728689 | 21.51886761 |
| F | 13.61807144 | 22.16206613 | 17.63985872 |
| F | 12.54046293 | 22.14656501 | 15.73224663 |
| F | 11.52804957 | 21.47272054 | 17.56391644 |
| F | 8.49133987  | 10.2345339  | 17.44406104 |
| F | 8.90126044  | 9.63684681  | 15.37683963 |
| F | 10.0501649  | 8.74004465  | 17.02468872 |
| F | 7.98926583  | 17.66938287 | 12.03905403 |
| F | 7.32391111  | 16.80284135 | 13.93935889 |
| F | 7.4672063   | 15.53365068 | 12.15133488 |
| F | 15.38165422 | 7.38145631  | 12.56658017 |
| F | 16.28687091 | 7.25340425  | 14.5582053  |
| F | 17.51110278 | 7.86663122  | 12.8361842  |
| F | 20.01131006 | 19.1919675  | 11.49814456 |
| F | 20.31356607 | 19.59692177 | 13.62944126 |
| F | 18.54984201 | 20.41620444 | 12.59887486 |
| C | 17.50030561 | 17.95626029 | 19.03645813 |
| C | 18.05582176 | 16.94119629 | 18.09444665 |
| C | 16.30795235 | 19.8396661  | 20.78298032 |
| C | 17.65969357 | 13.77340789 | 20.42381465 |
| C | 17.0151994  | 19.20320144 | 18.5437256  |
| C | 17.38273352 | 17.66601112 | 20.3825283  |
| C | 16.7997015  | 18.58780577 | 21.2850058  |
| C | 18.6187959  | 13.94807676 | 21.63576364 |
| C | 16.43449555 | 20.11809925 | 19.39632296 |
| C | 16.11207929 | 19.21760066 | 23.52624535 |
| C | 16.68408921 | 18.30113645 | 22.66946375 |

|   |             |             |             |
|---|-------------|-------------|-------------|
| C | 15.72144062 | 20.7575787  | 21.69068992 |
| C | 15.62797265 | 20.45351436 | 23.03358972 |
| C | 10.27839467 | 15.93277503 | 18.72609972 |
| C | 10.90336905 | 16.83323207 | 17.71132171 |
| C | 9.28831981  | 14.00849456 | 20.55396258 |
| C | 13.17870724 | 19.99622182 | 16.65793418 |
| C | 9.4211564   | 14.88103265 | 18.28567743 |
| C | 10.61386641 | 16.0218063  | 20.06559669 |
| C | 10.13434644 | 15.07705527 | 21.00857734 |
| C | 12.71613683 | 21.46760477 | 16.89118802 |
| C | 8.93965339  | 13.94704265 | 19.17873859 |
| C | 10.02641238 | 14.18577301 | 23.26847434 |
| C | 10.48502809 | 15.13823986 | 22.38237082 |
| C | 8.83282618  | 13.04660421 | 21.49152338 |
| C | 9.19428406  | 13.13258671 | 22.82025039 |
| C | 15.46315103 | 10.26828664 | 18.83163213 |
| C | 14.30787184 | 10.50207346 | 17.91604757 |
| C | 17.71303606 | 9.90734691  | 20.51451086 |
| C | 10.57805291 | 11.00571651 | 16.46172344 |
| C | 16.70207066 | 9.81408948  | 18.29956233 |
| C | 15.3636051  | 10.54666846 | 20.18539488 |
| C | 16.46740018 | 10.37352281 | 21.05661213 |
| C | 9.48170368  | 9.89971297  | 16.57613039 |
| C | 17.79427145 | 9.64167608  | 19.12187397 |
| C | 17.48182383 | 10.48763978 | 23.2650572  |
| C | 16.38652599 | 10.66313057 | 22.44420826 |
| C | 18.81608548 | 9.72962452  | 21.38720333 |
| C | 18.70217006 | 10.00832105 | 22.73406922 |
| C | 11.65242933 | 11.61433635 | 11.27718329 |

|   |             |             |             |
|---|-------------|-------------|-------------|
| C | 11.16956707 | 12.62790099 | 12.26043283 |
| C | 12.78177661 | 9.72511999  | 9.49582815  |
| C | 9.53832473  | 16.18893209 | 13.16282093 |
| C | 12.11235586 | 10.3513547  | 11.75003439 |
| C | 11.74298085 | 11.91114442 | 9.92886632  |
| C | 12.29682954 | 10.98603814 | 9.00753289  |
| C | 8.06025232  | 16.56082399 | 12.82809913 |
| C | 12.66429034 | 9.43546984  | 10.88136255 |
| C | 12.95994083 | 10.35606175 | 6.75322204  |
| C | 12.39912019 | 11.27061176 | 7.62058496  |
| C | 13.35651702 | 8.80919312  | 8.57784301  |
| C | 13.44486644 | 9.11715202  | 7.23578408  |
| C | 18.97994602 | 13.36571508 | 11.67816013 |
| C | 18.40338013 | 12.47149596 | 12.72310227 |
| C | 19.90809047 | 15.24636853 | 9.77662771  |
| C | 15.93312849 | 9.47590288  | 13.64872455 |
| C | 19.90929549 | 14.37783766 | 12.05035775 |
| C | 18.54201657 | 13.29025935 | 10.36618173 |
| C | 18.98685021 | 14.21495551 | 9.38802033  |
| C | 16.27473665 | 7.97177821  | 13.40939104 |
| C | 20.36001569 | 15.28904587 | 11.12217575 |
| C | 18.97499682 | 15.09310389 | 7.12061986  |
| C | 18.53928627 | 14.1637398  | 8.0417186   |
| C | 20.333825   | 16.18726434 | 8.80525499  |
| C | 19.87766368 | 16.11298163 | 7.50546902  |
| C | 13.66803509 | 19.002085   | 11.38267189 |
| C | 14.79505987 | 18.86910452 | 12.35064625 |
| C | 11.44035524 | 18.97639682 | 9.63784217  |
| C | 18.52190974 | 18.07459299 | 13.0463013  |

|   |             |             |             |
|---|-------------|-------------|-------------|
| C | 12.36441793 | 19.3203791  | 11.86402469 |
| C | 13.84946887 | 18.70683119 | 10.04262596 |
| C | 12.75696503 | 18.69102237 | 9.13960844  |
| C | 19.3763416  | 19.32865987 | 12.6883623  |
| C | 11.28265096 | 19.30535885 | 11.01041704 |
| C | 11.83058938 | 18.33149221 | 6.92055612  |
| C | 12.91991392 | 18.37623492 | 7.76520341  |
| C | 10.34138907 | 18.91613843 | 8.74366521  |
| C | 10.53141217 | 18.59897634 | 7.41436779  |

## Reference

- [1] G. Kresse, J. Furthmuller, Efficiency of ab-initio total energy calculations for metals and semiconductors using a plane-wave basis set. *Comp. Mater. Sci.* 1996, **6**, 15-50.
- [2] Kresse, Furthmuller, Efficient iterative schemes for ab initio total-energy calculations using a plane-wave basis set. *Phys. Rev. B.* 1996, **54**, 11169-11186.
- [3] J. P. Perdew, K. Burke, M. Ernzerhof, Ernzerhof, M., Generalized Gradient Approximation Made Simple. *Phys. Rev. Lett.* 1996, **77**, 3865-3868.
- [4] H. J. Monkhorst, J. D. Pack, Special points for Brillouin-zone integration. *Phys. Rev. B.* 1976, **13**, 5188-5192.
- [5] J. K. Norskov, J. Rossmeisl, A. Logadottir, L. Lindqvist, J. R. Kitchin, T. Bligaard, H. Jonsson, Origin of the Overpotential for Oxygen Reduction at a Fuel-Cell Cathode. *J. Phys. Chem. B.* 2004, **108**, 17886-17892.
- [6] S. Zhuang, D. Chen, Q. You, W. Fan, J. Yang, Z. Wu, Reduced Palladium Nanoclusters with Resolved Structures for the Electrocatalytic Reduction of Oxygen. *Angew. Chem. Int. Ed.* 2022, **61**, e202208751.
- [7] X. Zou, S. He, X. Kang, S. Chen, H. Yu, S. Jin, D. Astruc, M. Zhu, Thiolated, Reduced Palladium Nanoclusters with Resolved Structures for the Electrocatalytic Reduction of Oxygen. *Chem. Sci.*, 2021, **12**, 3660–3667
- [8] X. Wei, S. Song, W. Cai, X. Luo, L. Jiao, Q. Fang, X. Wang, N. Wu, Z. Luo, H. Wang, Z. Zhu, J. Li, L. Zheng, W. Gu, W. Song, S. Guo, C. Zhu, Tuning the spin state of Fe single atoms by Pd nanoclusters enables robust oxygen reduction with dissociative pathway. *Chem* 2022, **9**, 181–197.
- [9] F. Li, H.-J. Noh, W. Che, J.-P. Jeon, G.-F. Han, T. J. Shin, M. G. Kim, Y. Wang, Y. Bu, Zh. Fu, Y. Lu, J.-B. Baek, Tin Nanoclusters Confined in Nitrogenated Carbon for the Oxygen Reduction Reaction. *ACS Nano* 2022, **16**, 18830–18837.
- [10] L.-J. Yuan, B. Liu, L. Shen, Y.-K. Dai, Q. Li, C. Liu, W. Gong, X.-L. Sui, Z.-B. Wang, d-Orbital Electron Delocalization Realized by Axial Fe<sub>4</sub>C Atomic Clusters Delivers High-Performance Fe–N–C Catalysts for Oxygen Reduction Reaction. *Adv. Mater.* 2023, 2305945.
